# Supplementary material
Source: Springer Nature journal article supplement (https://www.springermedizin.de/resource/supplementary/12885_2008_1386_MOESM1_ESM.pdf/9472982)

**A****Mock 1****Mock 2****CtBP1#3****CtBP1#6****CtBP1#8****Mel Im**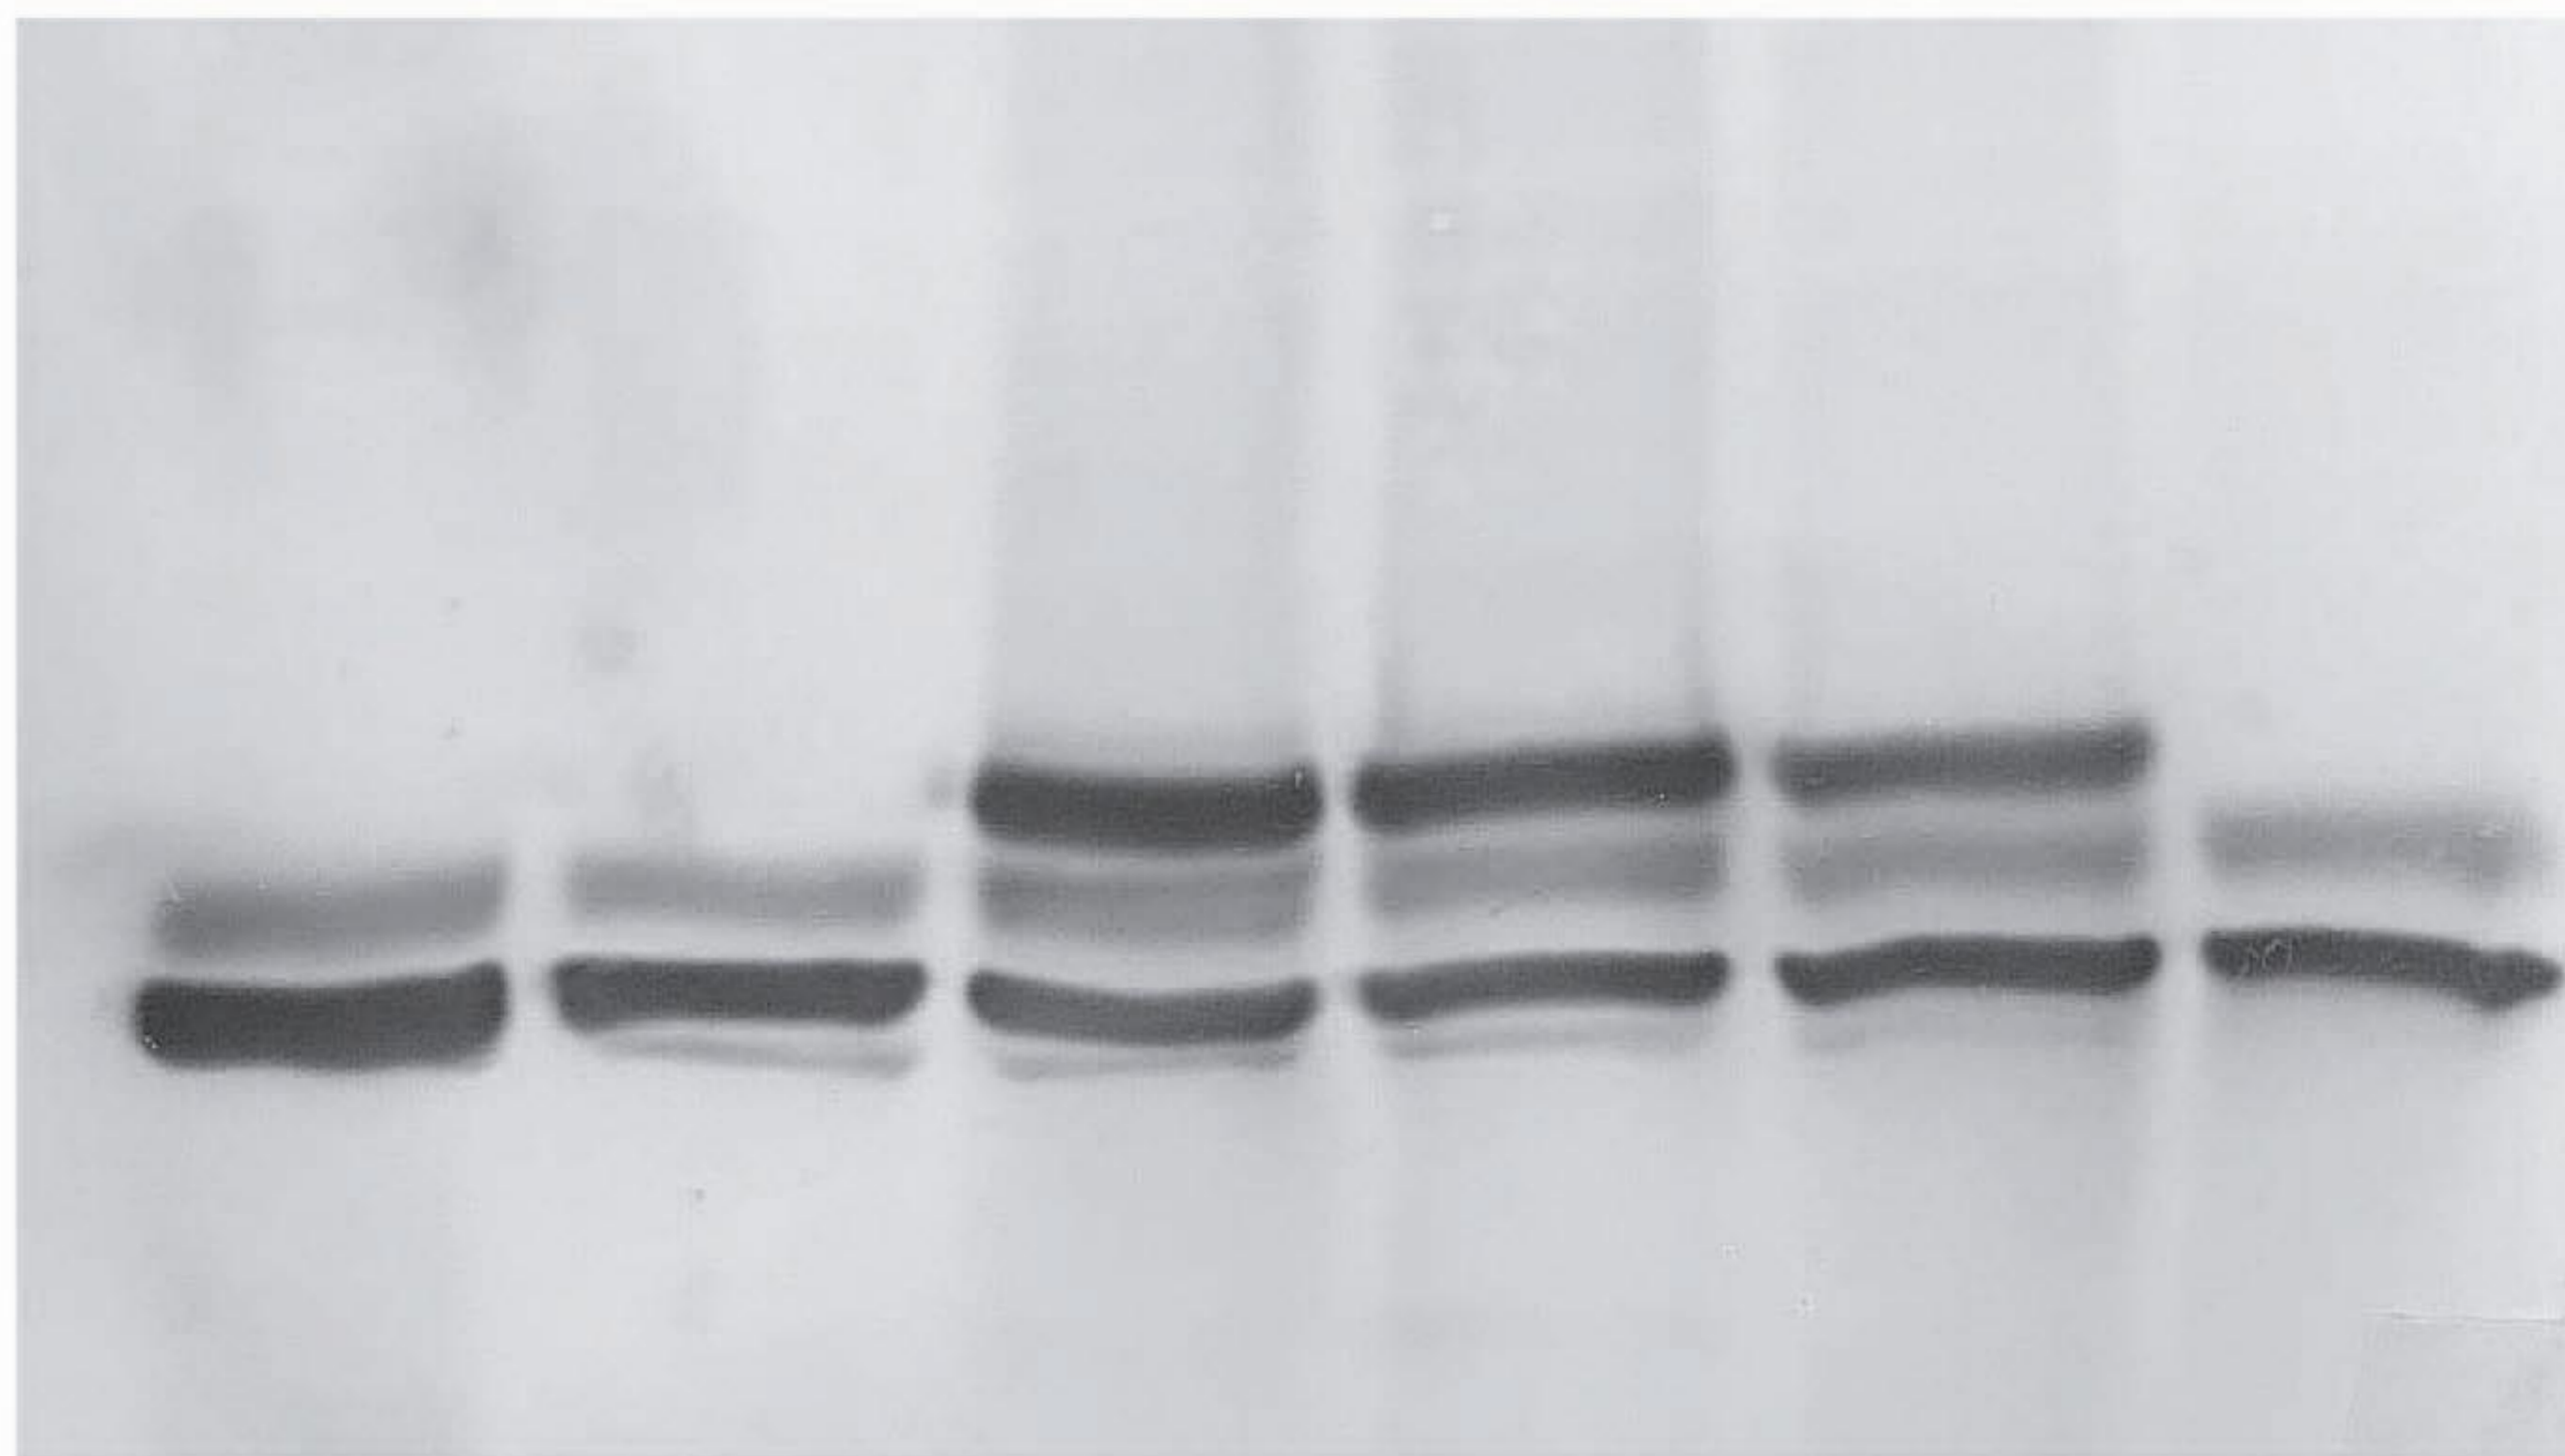**full length CtBP1****CtBP1splice** **$\beta$ -Actin****B**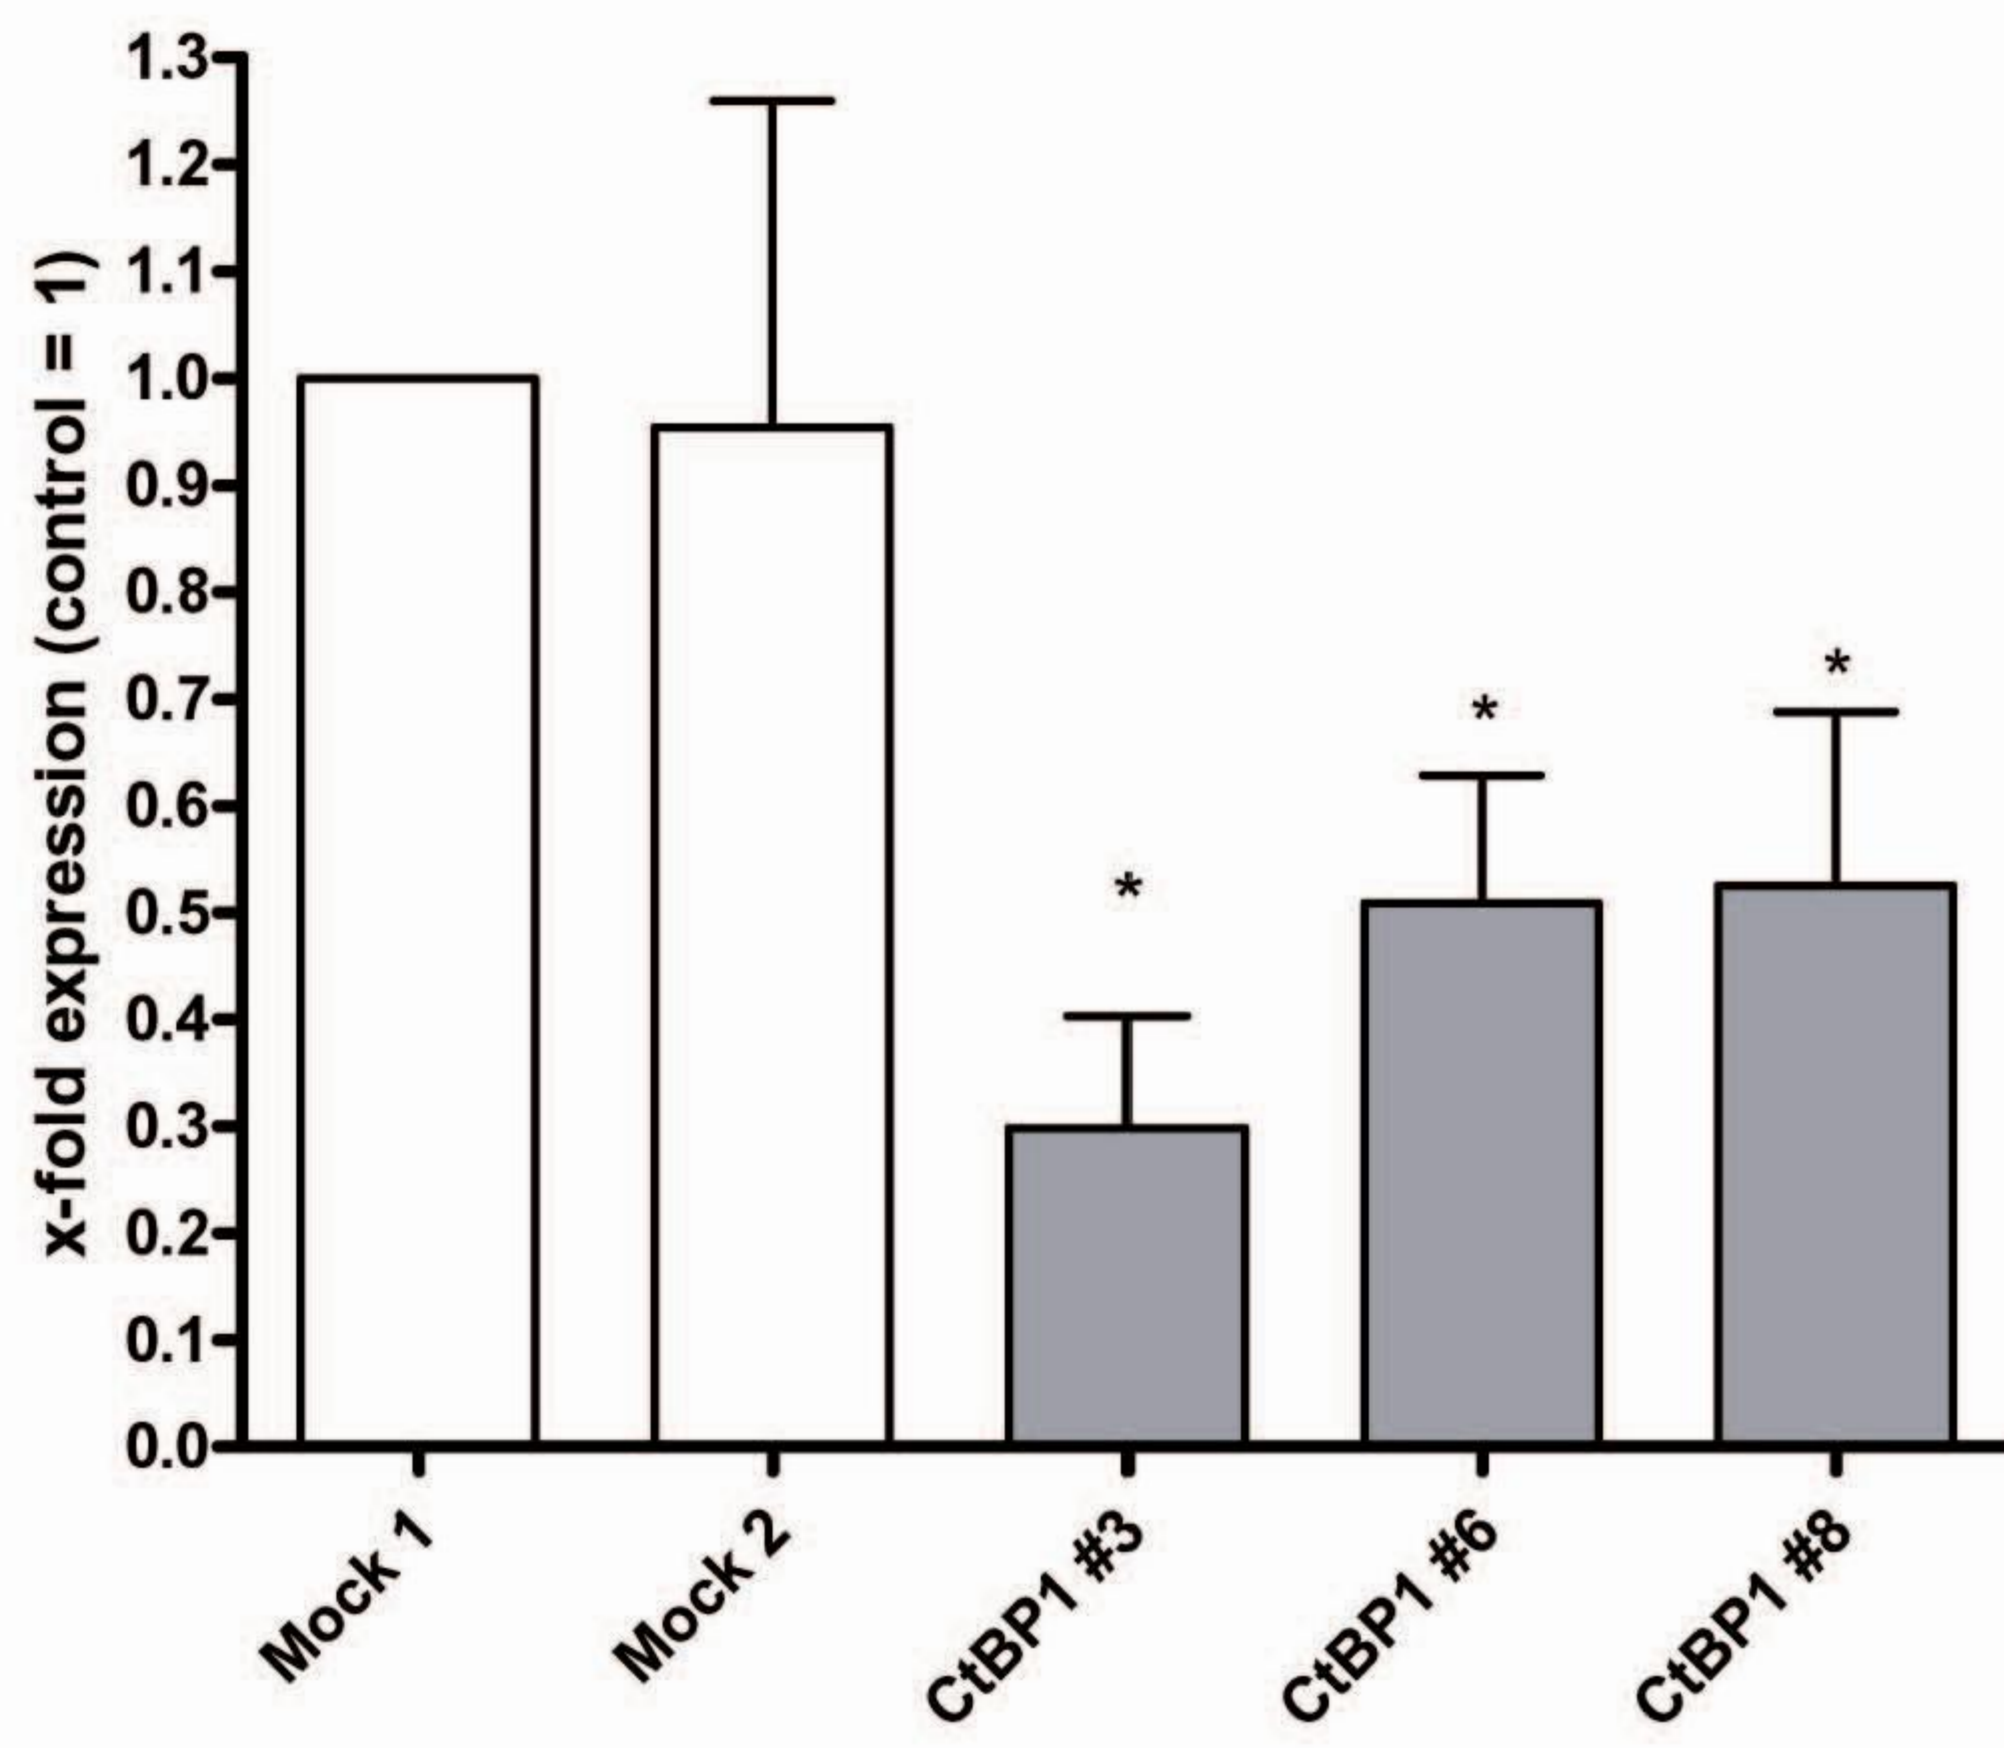

Supplement: MOESM1 [file 9472982]
